# Supplementary material for: Alternative Splicing Underpins the ALMT9 Transporter Function for Vacuolar Malic Acid Accumulation in Apple
Source: PubMed Central journal article supplement (PMC11165477; doi:10.1002/advs.202310159), 2024-03-21
Supplement: ADVS-11-2310159-s001.pdf [file ADVS-11-2310159-s001.pdf]

## Supporting Information

for *Adv. Sci.*, DOI 10.1002/adv.202310159

Alternative Splicing Underpins the ALMT9 Transporter Function for Vacuolar Malic Acid Accumulation in Apple

*Chunlong Li, Srinivasan Krishnan, Mengxia Zhang, Dagang Hu, Dong Meng, Janin Riedelsberger, Laura Dougherty, Kenong Xu, Miguel A. Piñeros\* and Liliang Cheng\**

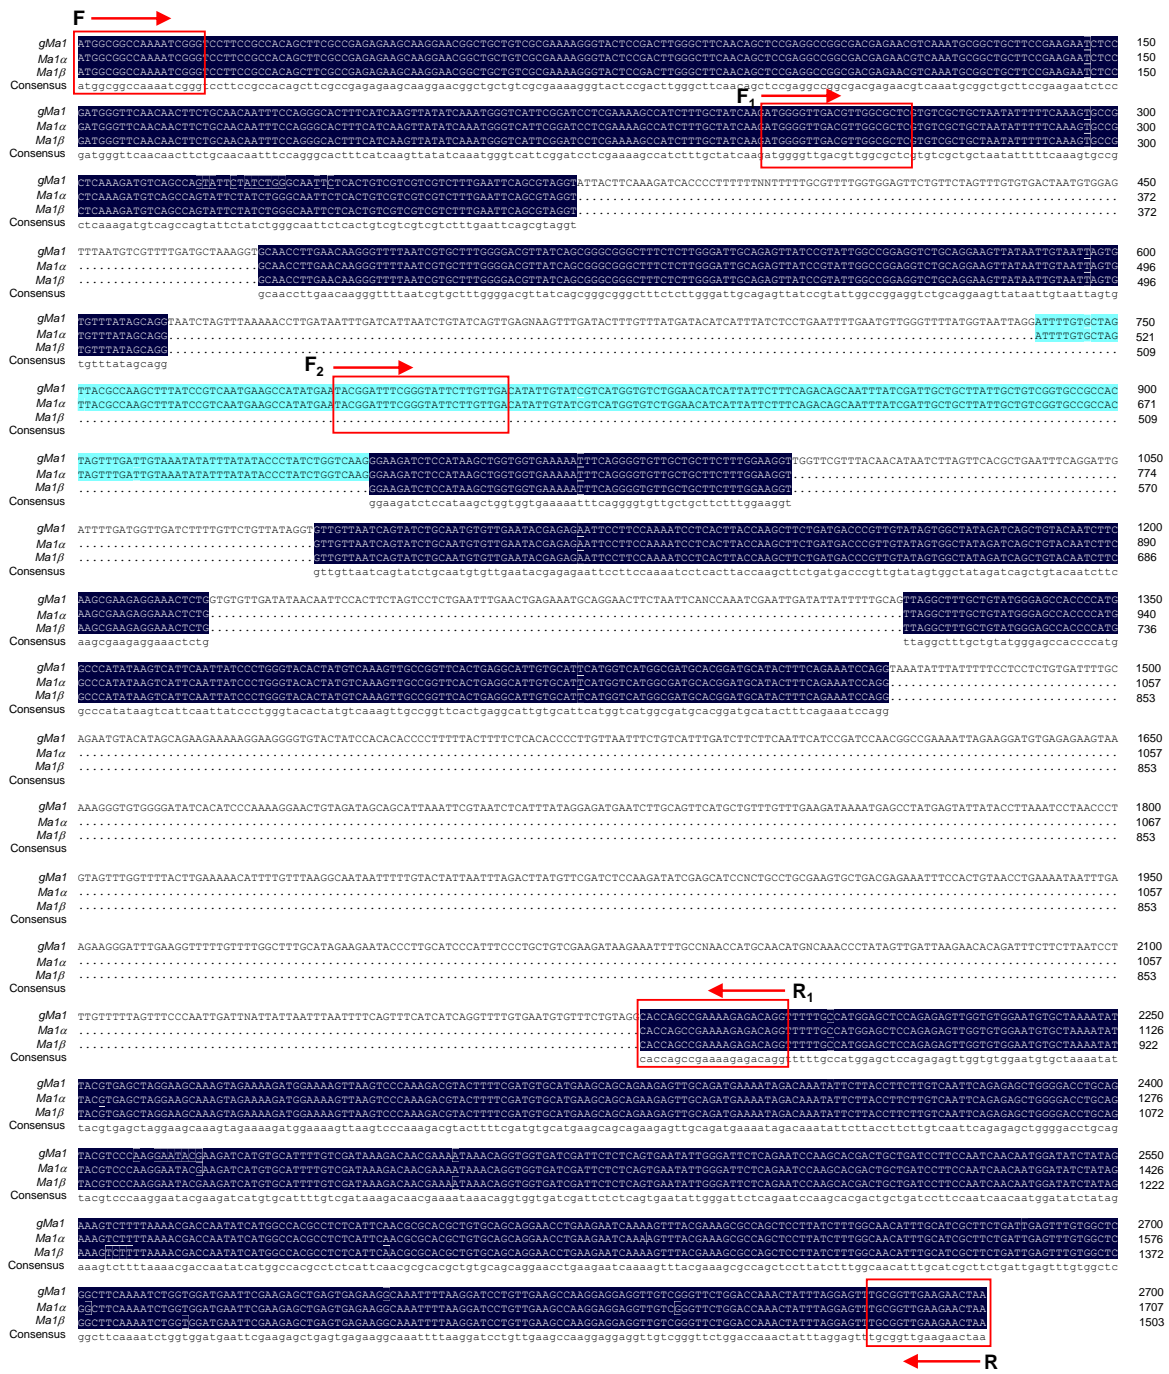

**Supplemental Figure 1.** Nucleotide sequence alignment of genomic *Ma1* (*gMa1*), *Ma1α* CDS and *Ma1β* CDS using DNAMAN software.

The primers used for the PCR assay of Figure 2A-C are highlighted in the red box.

|              |                                                                                                              |     |
|--------------|--------------------------------------------------------------------------------------------------------------|-----|
| Ma1 $\alpha$ | MAAKIGSFRHSFAERSKERLLSRKGYSDLGFNSSEAGDENVKCGCFRRISDGFNNFCNNFQGTFFIKLYQMGHSDPRKAIFAIKMGLTLALVSLLIFFKVP        | 100 |
| Ma1 $\beta$  | MAAKIGSFRHSFAERSKERLLSRKGYSDLGFNSSEAGDENVKCGCFRRISDGFNNFCNNFQGTFFIKLYQMGHSDPRKAIFAIKMGLTLALVSLLIFFKVP        | 100 |
| Consensus    | maakigsfrhsfaerskerllsrkgySDLGFNSSEAGDENVKCGCFRRISDGFNNFCNNFQGTFFIKLYQMGHSDPRKAIFAIKMGLTLALVSLLIFFKVP        |     |
| Ma1 $\alpha$ | LKDVSQYSIWAILTIVVVVFEFSVGTATLNKGFNRALGTLGAGGLSLGIAELSVLAGGLQEVIIIVISVFIAGFCASYAKLYPSMKPYEYGFVFLTYCIVM        | 200 |
| Ma1 $\beta$  | LKDVSQYSIWAILTIVVVVFEFSVGTATLNKGFNRALGTLGAGGLSLGIAELSVLAGGLQEVIIIVISVFIAG.....                               | 170 |
| Consensus    | lkdvSQYSIWAILTIVVVVFEFSVGTATLNKGFNRALGTLGAGGLSLGIAELSVLAGGLQEVIIIVISVFIAG.....                               |     |
| Ma1 $\alpha$ | VSGTSLFFQTAIYRLLLIAGAAATSLIVNIFIYPIWNSR.....EDLHKLWVKNFRGVAASLEGVVMQYVLCQVEYERIPSKILTYQASDDPLYSGYRSVAVQSSSEE | 300 |
| Ma1 $\beta$  | .....EDLHKLWVKNFRGVAASLEGVVMQYVLCQVEYERIPSKILTYQASDDPLYSGYRSVAVQSSSEE                                        | 232 |
| Consensus    | .....edlhklwvknfrgvaaslegvvmqyVLCQVEYERIPSKILTYQASDDPLYSGYRSVAVQSSSEE                                        |     |
| Ma1 $\alpha$ | ETLLGFVWPEPPHGPYKSFNYPWVHYVKVAGSLRHCAFVMVMAMHGCILSEIQAPAEKRQVFAMELQRVGVCEAKILRELGSKVEKMEKLSPKDVLFDVHE        | 400 |
| Ma1 $\beta$  | ETLLGFVWPEPPHGPYKSFNYPWVHYVKVAGSLRHCAFVMVMAMHGCILSEIQAPAEKRQVFAMELQRVGVCEAKILRELGSKVEKMEKLSPKDVLFDVHE        | 332 |
| Consensus    | etllgfavwpepphgpYKSFNYPWVHYVKVAGSLRHCAFVMVMAMHGCILSEIQAPAEKRQVFAMELQRVGVCEAKILRELGSKVEKMEKLSPKDVLFDVHE       |     |
| Ma1 $\alpha$ | AAEELQMKIDKYSYLLVNSESWGPAVRPKEYEDHVHFVDKDNENKQVVIDSLSEYWDSQNPSTADPSNQOWISIESLLKRPISWPRLSFNHNAVQQEPE          | 500 |
| Ma1 $\beta$  | AAEELQMKIDKYSYLLVNSESWGPAVRPKEYEDHVHFVDKDNENKQVVIDSLSEYWDSQNPSTADPSNQOWISIESLLKRPISWPRLSFNHNAVQQEPE          | 432 |
| Consensus    | aaeelqmkidkysyllvnseSWGPAVRPKEYEDHVHFVDKDNENKQVVIDSLSEYWDSQNPSTADPSNQOWISIESllkrpISWPRLSFNHNAVQQEPE          |     |
| Ma1 $\alpha$ | ESKVYESASSLSLATFASLLIEFVARLQNLVDEFELSEKANFKDPVEAKEEVVGFWTKLFRSLRLKN                                          | 568 |
| Ma1 $\beta$  | ESKVYESASSLSLATFASLLIEFVARLQNLVDEFELSEKANFKDPVEAKEEVVGFWTKLFRSLRLKN                                          | 500 |
| Consensus    | eskvyesasslsLATFASllIEFVARLqnlVDEFELSEKANFKDPVEAKEEVVGFWTKLFRslrLkn                                          |     |

**Supplemental Figure 2.** Protein sequence alignment of Ma1 $\alpha$  and Ma1 $\beta$  using DNAMAN software.

The peptide sequence ELSEKANFKDPVEA used to generate the antibody against Ma1 is highlighted in the red box.

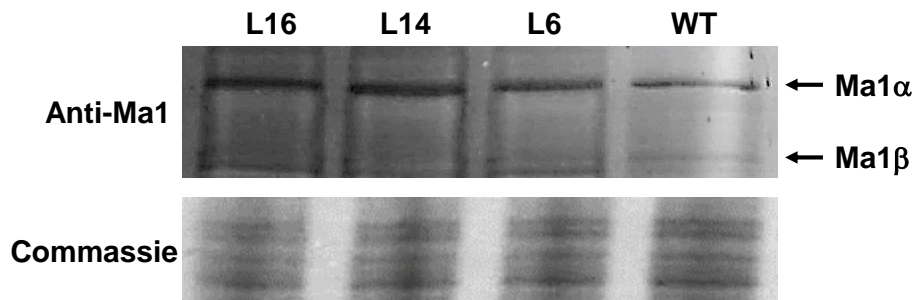

**Supplemental Figure 3.** Detection of Ma1 $\alpha$  and Ma1 $\beta$  proteins by immunoblotting at the peak of malic acid accumulation (31 days after bloom) during fruit development in wild type (WT) and *cMa1*-OE lines (L6, L14, L16) of 'Royal Gala' apple.

The antibody was generated against peptide ELSEKANFKDPVEA in rabbit, which recognizes both Ma1 $\alpha$  and Ma1 $\beta$ .

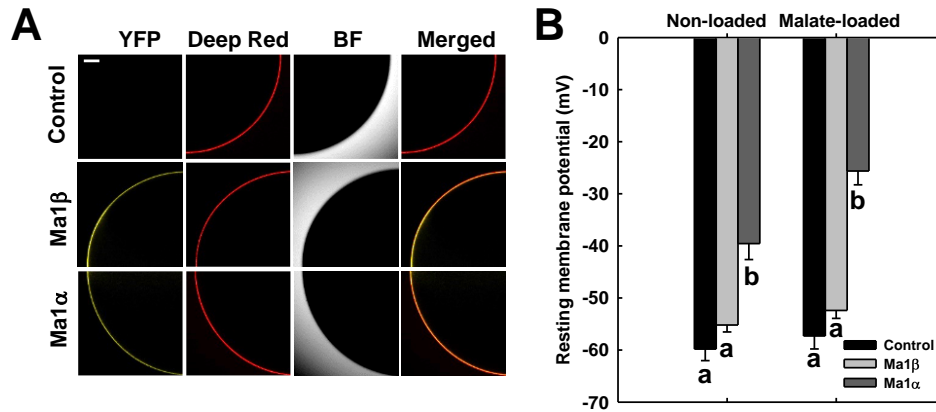

**Supplemental Figure 4.** Localization of Ma1 $\beta$ -YFP and Ma1 $\alpha$ -YFP fusion proteins in oocytes and Resting Membrane Potentials (RMPs) recorded in control and Ma1 $\beta$  or Ma1 $\alpha$ -expressing cells

**(A)** Expression and localization of Ma1 $\beta$ -YFP and Ma1 $\alpha$ -YFP fusion proteins in oocytes, with Deep Red as a plasma membrane marker (PM Marker). Each oocyte was injected with 25 ng cRNA. Bar = 100  $\mu$ m. BF: Bright Field.

**(B)** RMPs recorded in control and Ma1 $\beta$  or Ma1 $\alpha$ -expressing cells. RMPs were recorded in cells non-loaded or loaded with malate by microinjecting cells with 50 nl of 100 mM Na-Malate (increasing cytosolic malate<sup>2-</sup> concentration by 4.5 mM) 2 to 3 hours prior to the electrophysiological recordings. Data are mean  $\pm$  SE. The number of cells recorded: Control-non-loaded (n = 11), Ma1 $\beta$ -non-loaded (n = 18), Ma1 $\alpha$ -non-loaded (n = 9), Control-malate-loaded (n = 10), Ma1 $\beta$ -malate-loaded (n = 20), and Ma1 $\alpha$ -malate-loaded (n = 19). Different letters (a, b, c) indicate significant differences between groups using Tukey's HSD test at P < 0.05 after ANOVA.

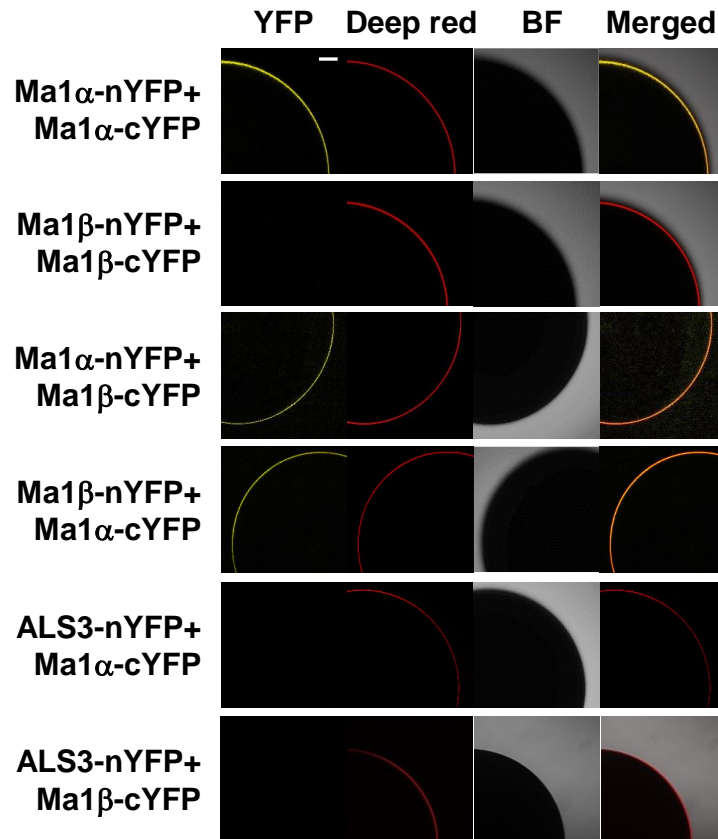

**Supplemental Figure 5.** BiFC assays of Ma1 $\alpha$  and Ma1 $\beta$  in *Xenopus laevis* oocytes.

BiFC assays of Ma1 $\alpha$  and Ma1 $\beta$  in *X. laevis* oocytes co-expressing Ma1 $\alpha$ -nYFP/Ma1 $\alpha$ -cYFP, Ma1 $\beta$ -nYFP/Ma1 $\beta$ -cYFP, Ma1 $\alpha$ -nYFP/Ma1 $\beta$ -cYFP, or Ma1 $\beta$ -nYFP/Ma1 $\alpha$ -cYFP fusion constructs, with a tonoplast localized protein ALS3 and empty vector (nYFP) as negative controls. Deep Red was used as a plasma membrane marker (PM Marker). Bar = 100  $\mu$ m. BF: Bright Field.

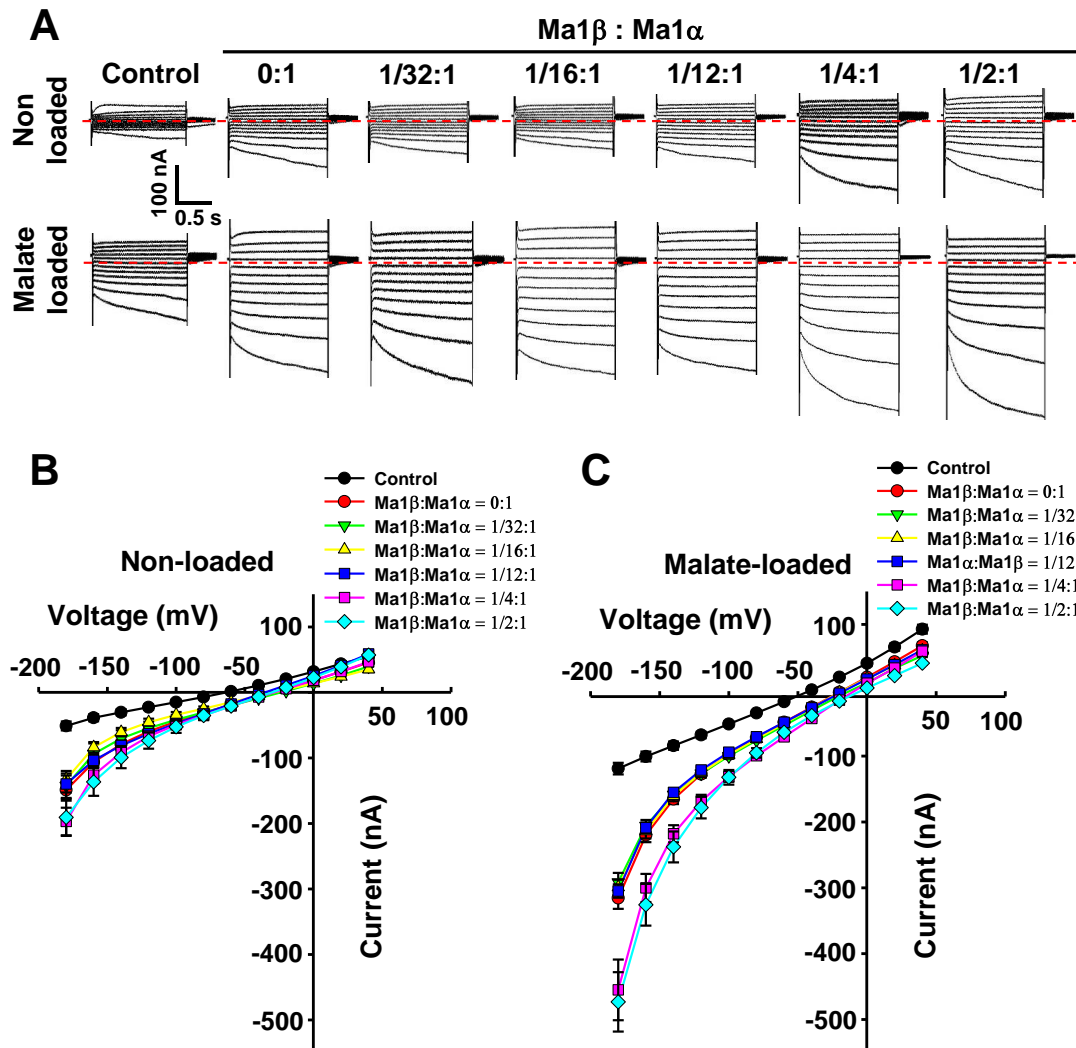

**Supplemental Figure 6.** Malate transport activity in *Xenopus laevis* oocytes co-expressing *Ma1 $\alpha$*  and *Ma1 $\beta$*  genes in various ratios.

**(A)** Examples of currents elicited in response to holding potentials ranging from +40 to -180 mV (in 20 mV steps) recorded in control, *Ma1 $\beta$* /*Ma1 $\alpha$*  co-expressing cells, either non-loaded or loaded with malate. *Ma1 $\beta$* : *Ma1 $\alpha$*  = 0:1, 1/32:1, 1/16:1, 1/12:1, 1/4:1, 1/2:1 at a fixed amount (25 ng) of *Ma1 $\alpha$*  cRNA. The zero-current level is indicated by the red dotted line.

**(B)** Current-voltage (*I/V*) relationships constructed from steady-state current recordings with non-loaded cells such as those shown in **A**. Data are mean  $\pm$  SE. The number of cells recorded: Control ( $n = 18$ ), 0:1 ( $n = 15$ ), 1/32:1 ( $n = 10$ ), 1/16:1 ( $n = 10$ ), 1/12:1 ( $n = 10$ ), 1/4:1 ( $n = 10$ ), and 1/2:1 ( $n = 10$ ).

**(C)** Current-voltage (*I/V*) relationships constructed from steady-state current recordings with malate-loaded cells such as those shown in **A**. Data are mean  $\pm$  SE. The number of cells recorded: Control ( $n = 16$ ), 0:1 ( $n = 17$ ), 1/32:1 ( $n = 10$ ), 1/16:1 ( $n = 24$ ), 1/12:1 ( $n = 22$ ), 1/4:1 ( $n = 22$ ), and 1/2:1 ( $n = 15$ ).

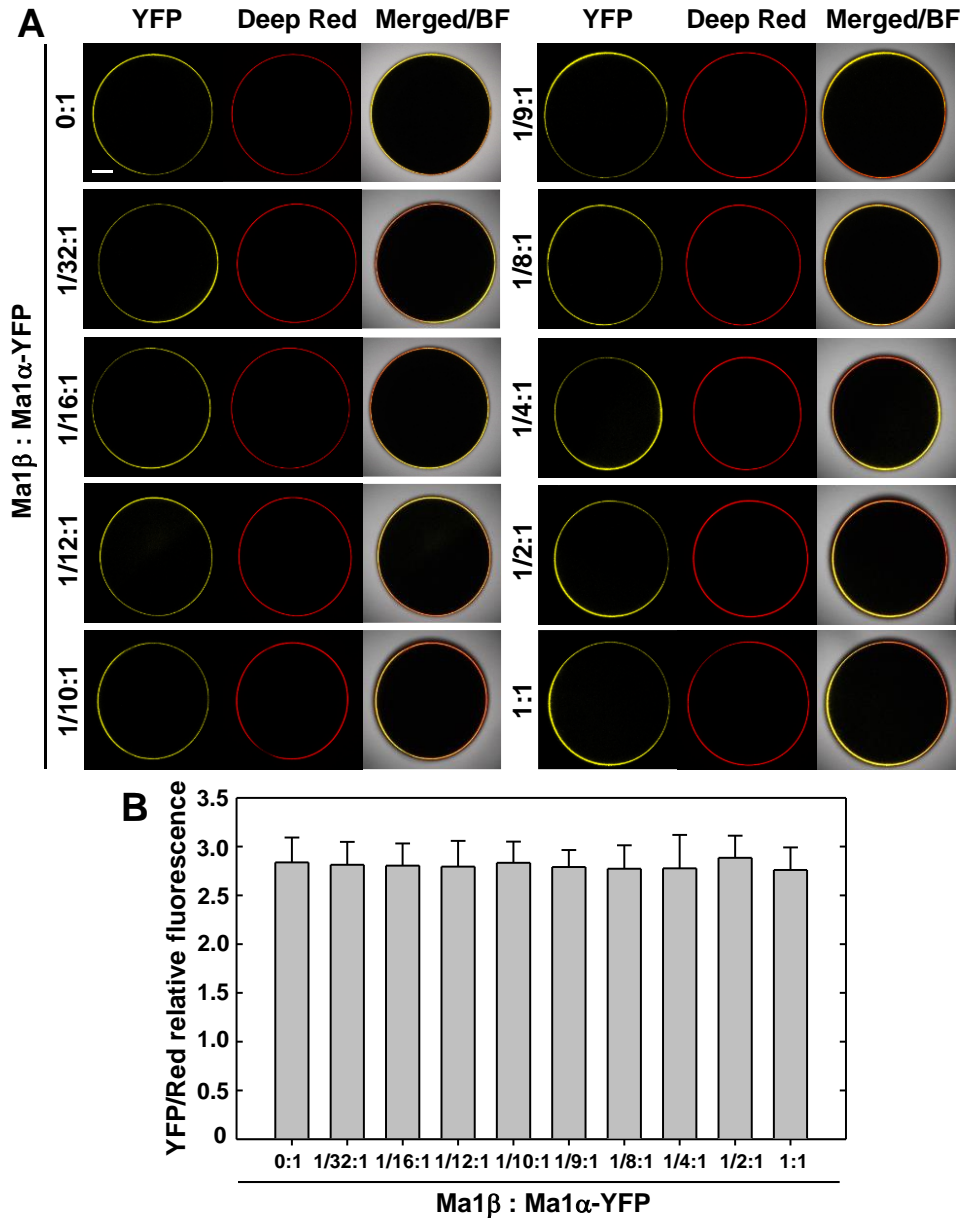

**Supplemental Figure 7.** Ma1 $\alpha$  protein expression is not affected by injection of Ma1 $\beta$  cRNA at different ratios in *Xenopus laevis* oocytes.

**(A)** Representative images of the Ma1 $\alpha$ -YFP fluorescence signals in oocytes co-injected with Ma1 $\beta$  at the indicated ratios, at a fixed amount of Ma1 $\alpha$  cRNA (25 ng) per oocyte. Deep red was used as a plasma membrane marker and a reference fluorescence signal. Bar = 200  $\mu$ m. BF: Bright Field.

**(B)** The expression of Ma1 $\alpha$  protein indicated by the YFP/Red relative fluorescence in response to the addition of Ma1 $\beta$ . Data are mean  $\pm$  SE of 20 cells recorded.

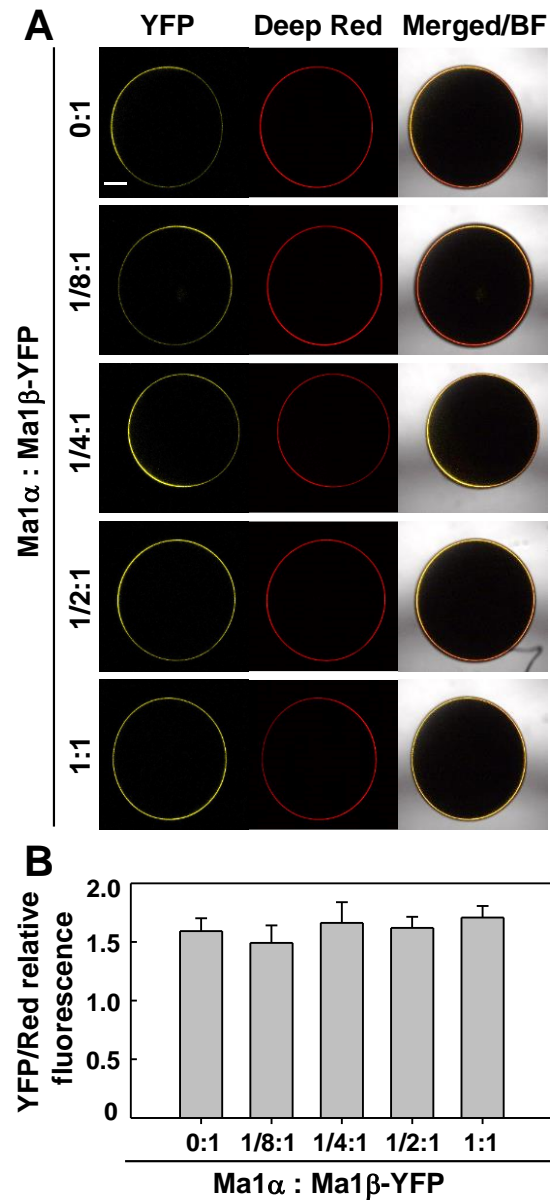

**Supplemental Figure 8.** Ma1 $\beta$  protein expression is not affected by co-injection of *Ma1 $\alpha$*  cRNA at different ratios in *Xenopus laevis* oocytes.

**(A)** Representative images of the Ma1 $\beta$ -YFP fluorescence signals in oocytes co-injected with *Ma1 $\alpha$*  at the indicated ratios, at a fixed amount of Ma1 $\beta$  cRNA (25 ng) per oocyte. Deep red was used as a plasma membrane marker and a reference fluorescence signal. Bar = 200  $\mu$ m. BF: Bright Field.

**(B)** The expression of Ma1 $\beta$  protein indicated by the YFP/Red relative fluorescence in response to the addition of *Ma1 $\alpha$* . Data are mean  $\pm$  SE of 20 cells recorded.



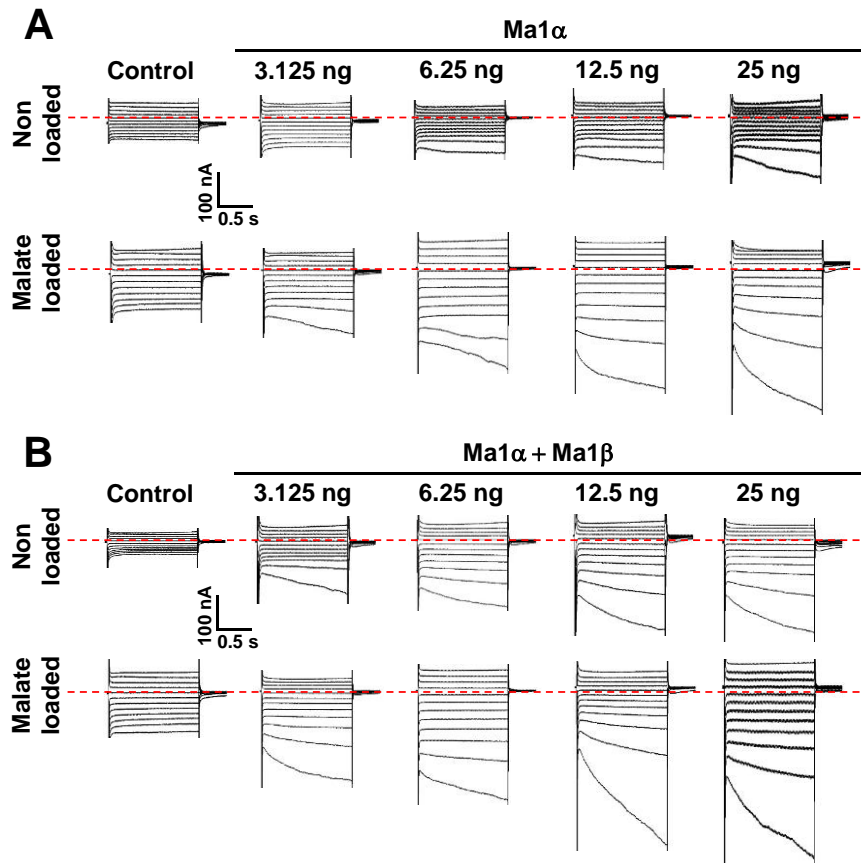

**Supplemental Figure 9.** Traces of currents elicited in *Xenopus laevis* oocytes in response to increasing amounts of *Ma1 $\alpha$*  cRNA alone or co-expressed at a constant ratio with *Ma1 $\beta$* .

**(A)** Examples of currents elicited in response to holding potentials ranging from +40 to -180 mV (in 20 mV steps) recorded in non-loaded and malate-loaded oocyte cells injected with various amounts of *Ma1 $\alpha$*  cRNA (0 to 25 ng). The red dotted line indicates the zero-current level.

**(B)** Examples of currents elicited in response to holding potentials ranging from +40 to -180 mV (in 20 mV steps) recorded in non-loaded and malate-loaded oocyte cells injected with *Ma1 $\alpha$*  and *Ma1 $\beta$*  cRNA in a constant ratio of 1 to 1/8 at various amounts of *Ma1 $\alpha$*  cRNA (0 to 25 ng). The red dotted line indicates the zero-current level.

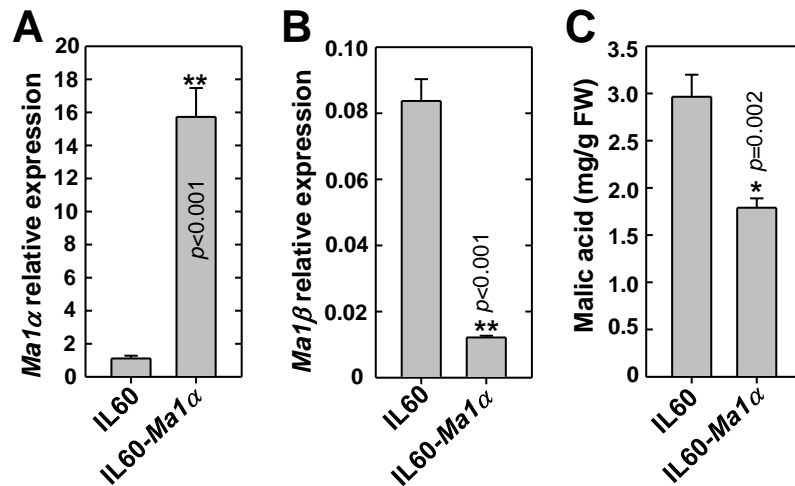

**Supplemental Figure 10.** Virus-based gene-overexpression of *Ma1α* decreases malic acid concentrations in wild-type 'Royal Gala' mature fruit.

**(A)** The expression of *Ma1α* after rattle virus-based gene-overexpression of *Ma1α*.

**(B)** The expression of *Ma1β* after rattle virus-based gene-overexpression of *Ma1α*.

**(C)** Fruit malic acid concentrations in response to rattle virus-based gene-overexpression of *Ma1α*.

Virus vector IL60-*Ma1α* was infiltrated into fruit for overexpression of *Ma1α*, with empty vector (IL60) as a control. Data are mean  $\pm$  SE of 5 biological replicates with 3 fruits per replicate (3 injection sites per fruit). \* Represents significant differences using Student's *t* test at  $P < 0.05$ , \*\* Represents significant differences using Student's *t* test at  $P < 0.01$ .

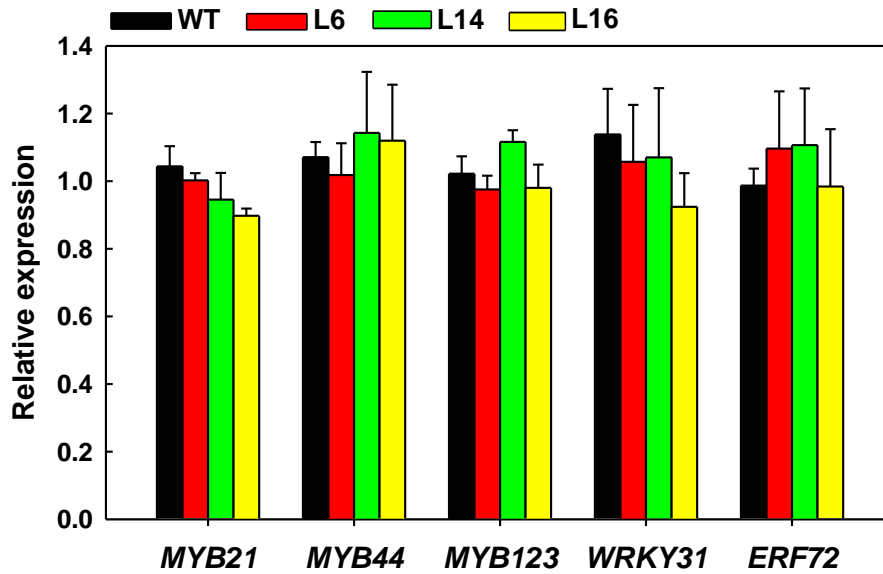

**Supplemental Figure 11.** Expression levels of several transcription factors at the peak of malic acid accumulation (31 days after bloom) during fruit development in wild type (WT) and *cMa1*-OE lines (L6, L14, L16) of 'Royal Gala' apple.

Quantitative RT-PCR was performed using gene-specific primers (Supplemental Table 1), with *actin* as the internal reference gene, and the relative expression level of each gene was obtained using the ddCT method. Data are mean  $\pm$  SE of 5 biological replicates, with 6 fruits pooled from 2 trees per replicate.

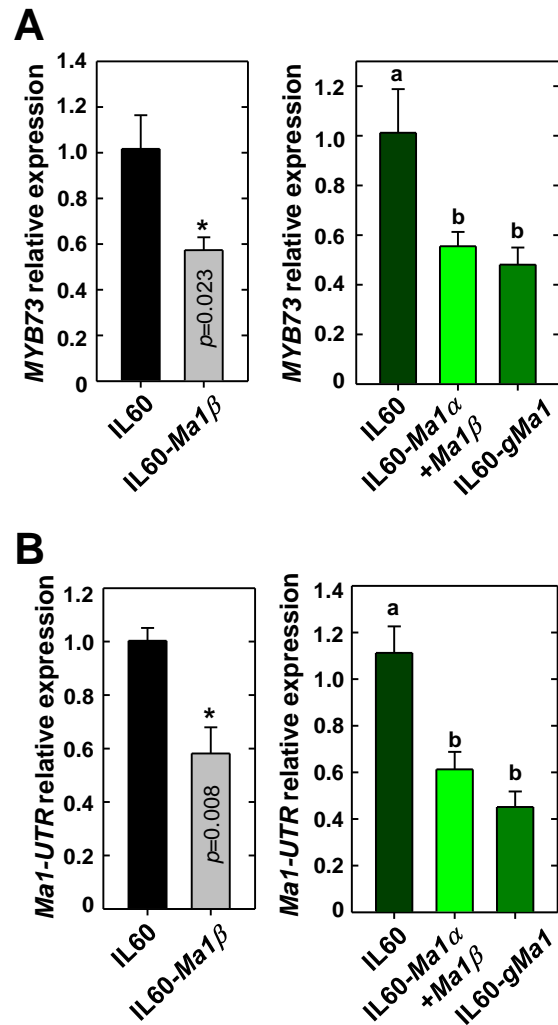

**Supplemental Figure 12.** Transcript levels of *MYB73* and the native *Ma1* gene in response to overexpression of *Ma1 $\beta$* , *Ma1 $\alpha$*  and *Ma1 $\beta$* , or *gMa1* in wild-type ‘Royal Gala’ apple.

**(A)** The expression level of *MYB73* after rattle virus-based gene-overexpression of *Ma1 $\beta$* , both *Ma1 $\alpha$*  and *Ma1 $\beta$*  or genomic sequence of *Ma1* (*gMa1*) in WT mature fruits. Fruit was infiltrated with virus vector IL60-*Ma1 $\beta$*  for overexpression of *Ma1 $\beta$* . IL60-*Ma1 $\alpha$*  and IL60-*Ma1 $\beta$*  were co-infiltrated, or IL60-*gMa1* was infiltrated into fruits for overexpression of *Ma1 $\alpha$*  and *Ma1 $\beta$* . Fruit infiltrated with empty vector (IL60) was used as control.

**(B)** The expression level of native *Ma1* gene after rattle virus-based gene-overexpression of *Ma1 $\beta$* , both *Ma1 $\alpha$*  and *Ma1 $\beta$*  or genomic sequence of *Ma1* (*gMa1*) in WT mature fruits. Fruit was infiltrated with virus vector IL60-*Ma1 $\beta$*  for overexpression of *Ma1 $\beta$* . IL60-*Ma1 $\alpha$*  and IL60-*Ma1 $\beta$*  were co-infiltrated, or IL60-*gMa1* was infiltrated into fruits for overexpression of *Ma1 $\alpha$*  and *Ma1 $\beta$* . Fruit infiltrated with empty vector (IL60) was used as control.

Quantitative RT-PCR was performed using gene-specific primers (Supplemental Table 1), with *actin* as the internal reference gene, and the relative expression level of each gene was obtained using the ddCT method. Data are mean  $\pm$  SE of 5 biological replicates with 3 fruits

per replicate (3 injection sites per fruit). \* Represents significant differences using Student's *t* test at  $P < 0.05$ . Different letters (a, b) indicate significant difference between groups using Tukey's HSD test at  $P < 0.05$  after ANOVA.

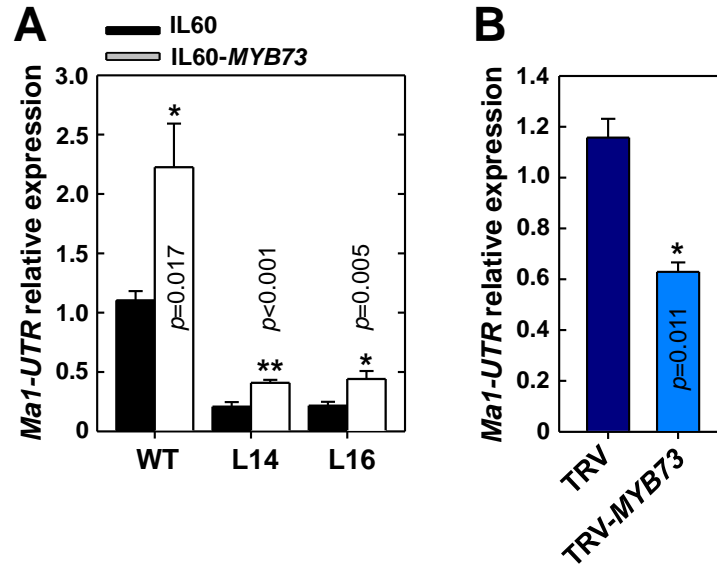

**Supplemental Figure 13.** The native *Ma1* transcript levels in response to virus-based gene-overexpression or silencing of *MdMYB73* in mature fruits of wild-type and *cMa1*-OE lines of 'Royal Gala' apple.

**(A)** The expression of native *Ma1* in response to rattle virus-based gene-overexpression of *MdMYB73* in mature fruits of WT and *cMa1*-OE lines (L14 and L16).

**(B)** The expression of native *Ma1* in response to rattle virus-induced gene-silencing of *MdMYB73* in WT mature fruit.

Virus vectors IL60-MYB73 and TRV-MYB73 were infiltrated into fruit for overexpression and silencing of MYB73, with empty vectors (IL60 or TRV) as control, respectively. Data are mean  $\pm$  SE of 5 biological replicates with 3 fruits per replicate (3 injection sites per fruit). \* Represents significant differences using Student's *t* test at  $P < 0.05$ , \*\* Represents significant differences using Student's *t* test at  $P < 0.01$ .

**Supplemental Table 1. Statistical analysis of transmembrane current (nA) at various ratios of Ma1 $\beta$ /Ma1 $\alpha$  under malate-loaded conditions in oocytes.**

|                                    | -180 mV         | -160 mV         | -140 mV         | -120 mV         | -100 mV         | -80 mV        | -60 mV        | -40 mV        | -20 mV        | 0 mV         | 20 mV        | 40 mV        |
|------------------------------------|-----------------|-----------------|-----------------|-----------------|-----------------|---------------|---------------|---------------|---------------|--------------|--------------|--------------|
| Control                            | -112.60±4.64 a  | -89.10±4.17 a   | -72.26±3.73 a   | -57.16±3.21 a   | -42.62±2.67 a   | -28.19±2.17 a | -13.91±1.75 a | 0.68±1.55 a   | 16.19±1.69 a  | 33.16±2.26 a | 53.26±3.15 a | 76.80±3.95 a |
| Ma1 $\beta$ :Ma1 $\alpha$ = 0:1    | -300.86±8.23 b  | -206.86±6.33 b  | -154.49±4.93 b  | -118.55±3.91 b  | -90.69±3.18 b   | -66.87±2.59 b | -45.23±2.11 b | -24.88±1.73 b | -5.11±1.63 b  | 14.50±2.03 b | 34.80±2.83 b | 56.31±3.80 b |
| Ma1 $\beta$ :Ma1 $\alpha$ = 1/32:1 | -291.76±14.43 b | -205.90±8.96 b  | -158.61±6.59 b  | -126.41±5.21 b  | -99.90±3.75 b   | -76.18±2.57 b | -53.61±1.66 b | -30.64±2.16 b | -8.47±2.89 b  | 11.02±1.99 b | 33.39±2.65 b | 52.54±2.19 b |
| Ma1 $\beta$ :Ma1 $\alpha$ = 1/16:1 | -299.25±11.57 b | -214.14±11.03 b | -160.57±8.02 b  | -125.22±6.52 b  | -98.08±5.78 b   | -73.88±4.97 b | -50.72±4.27 b | -27.22±3.71 b | -3.19±3.33 b  | 17.88±2.39 b | 37.77±2.02 b | 60.14±2.03 b |
| Ma1 $\beta$ :Ma1 $\alpha$ = 1/12:1 | -304.83±10.14 b | -208.80±7.94 b  | -155.19±6.27 b  | -121.16±5.08 b  | -94.08±4.07 b   | -70.78±3.35 b | -48.69±2.96 b | -26.84±2.58 b | -4.69±2.43 b  | 16.98±2.68 b | 38.81±3.19 b | 61.26±3.83 b |
| Ma1 $\beta$ :Ma1 $\alpha$ = 1/10:1 | -308.66±13.21 b | -219.93±9.68 b  | -163.19±6.71 b  | -128.11±5.08 b  | -100.29±4.13 b  | -76.57±3.42 b | -54.83±2.77 b | -33.86±2.18 b | -12.49±1.85 c | 9.64±2.07 b  | 33.19±2.96 b | 58.49±4.35 b |
| Ma1 $\beta$ :Ma1 $\alpha$ = 1/9:1  | -329.18±18.99 b | -231.59±11.88 b | -172.16±9.53 b  | -133.91±7.08 b  | -103.68±5.42 b  | -77.66±4.19 b | -53.96±3.23 b | -30.95±2.48 b | -8.56±2.03 b  | 13.48±2.42 b | 35.77±3.63 b | 59.20±5.36 b |
| Ma1 $\beta$ :Ma1 $\alpha$ = 1/8:1  | -454.62±10.30 c | -296.18±7.21 c  | -212.51±5.64 c  | -160.70±4.20 c  | -123.52±3.07 c  | -93.38±2.22 c | -67.47±1.60 c | -43.60±1.20 c | -20.55±1.06 c | 1.89±1.22 c  | 24.08±1.61 b | 46.62±2.16 b |
| Ma1 $\beta$ :Ma1 $\alpha$ = 1/4:1  | -454.96±46.06 c | -300.20±21.36 c | -217.95±13.02 c | -168.72±10.00 c | -131.27±7.69 c  | -99.52±6.15 c | -70.84±4.60 c | -43.02±3.30 c | -15.08±3.05 c | 10.61±3.92 b | 33.55±5.27 b | 59.20±6.47 b |
| Ma1 $\beta$ :Ma1 $\alpha$ = 1/2:1  | -473.26±45.09 c | -325.74±31.69 c | -237.94±23.49 c | -178.20±16.39 c | -132.23±11.16 c | -95.11±7.24 c | -63.83±4.42 c | -38.56±2.50 c | -16.58±1.49 c | 3.48±1.12 c  | 22.15±1.22 b | 41.09±1.87 b |
| Ma1 $\beta$ :Ma1 $\alpha$ = 1:1    | -466.60±19.21 c | -314.89±13.73 c | -230.52±11.39 c | -173.52±9.24 c  | -131.01±7.27 c  | -95.80±5.49 c | -66.61±4.13 c | -41.02±3.05 c | -18.14±2.19 c | 4.44±1.80 c  | 28.12±2.32 b | 54.21±3.92 b |

Note: Different letters (a, b, c) indicate significant difference between groups using Tukey's Honest Significant Difference test at  $P < 0.05$  after one-way ANOVA.

**Supplemental Table 2. Statistical analysis of transmembrane current (nA) at different amounts of Ma1 $\alpha$  alone or co-expressed with Ma1 $\beta$  (at 1/8 Ma1 $\alpha$ ) under malate-loaded conditions in oocytes.**

|                       |                           | -180 mV        | -160 mV        | -140 mV        | -120 mV        | -100 mV        | -80 mV        | -60 mV        | -40 mV       | -20 mV     | 0 mV       | 20 mV      | 40 mV       |
|-----------------------|---------------------------|----------------|----------------|----------------|----------------|----------------|---------------|---------------|--------------|------------|------------|------------|-------------|
| 0 ng Ma1 $\alpha$     | Control-1                 | -103.35±7.74   | -84.17±6.13    | -69.36±5.19    | -54.15±3.97    | -37.88±2.93    | -21.27±2.17   | -4.63±1.66    | 11.51±1.57   | 26.57±1.68 | 41.90±2.24 | 58.99±3.10 | 71.36±2.83  |
|                       | Control-2                 | -101.59±12.10  | -75.78±10.71   | -59.47±9.14    | -45.32±7.67    | -30.68±6.28    | -15.74±4.99   | -0.82±3.73    | 13.66±2.59   | 26.92±1.76 | 40.13±1.39 | 56.36±1.87 | 69.68±2.45  |
|                       | <i>P</i> vaule            | 0.904          | 0.904          | 0.372          | 0.334          | 0.328          | 0.339         | 0.379         | 0.499        | 0.889      | 0.503      | 0.468      | 0.658       |
| 3.125 ng Ma1 $\alpha$ | Ma1 $\alpha$              | -170.83±10.10  | -125.77±7.89   | -99.35±6.83    | -76.99±5.72    | -55.85±4.72    | -35.29±3.61   | -15.01±2.50   | 4.62±1.61    | 22.74±1.32 | 40.67±1.76 | 59.29±2.63 | 78.34±4.12  |
|                       | Ma1 $\alpha$ +Ma1 $\beta$ | -280.47±17.93* | -193.56±17.63* | -149.42±15.52* | -114.37±13.42* | -83.15±10.89*  | -54.57±8.25*  | -27.78±5.62*  | -2.30±3.11*  | 20.46±1.64 | 41.28±3.14 | 62.18±5.71 | 85.34±8.95  |
|                       | <i>P</i> vaule            | <0.001         | 0.001          | 0.004          | 0.011          | 0.021          | 0.030         | 0.035         | 0.047        | 0.287      | 0.860      | 0.624      | 0.451       |
| 6.25 ng Ma1 $\alpha$  | Ma1 $\alpha$              | -235.34±29.88  | -150.91±10.12  | -111.26±5.76   | -84.85±4.80    | -61.65±3.89    | -40.51±2.91   | -19.83±2.13   | 0.19±1.59    | 18.19±1.36 | 35.18±1.78 | 52.65±2.76 | 72.05±4.15  |
|                       | Ma1 $\alpha$ +Ma1 $\beta$ | -432.63±35.16* | -255.76±19.55* | -178.87±17.30* | -132.97±14.79* | -97.84±12.35*  | -68.23±10.07* | -40.59±7.68*  | -14.45±5.34* | 9.56±1.95* | 30.70±1.72 | 50.10±2.35 | 74.24±4.98  |
|                       | <i>P</i> vaule            | <0.001         | <0.001         | 0.003          | 0.011          | 0.020          | 0.027         | 0.029         | 0.028        | 0.003      | 0.090      | 0.490      | 0.747       |
| 12.5 ng Ma1 $\alpha$  | Ma1 $\alpha$              | -340.73±19.45  | -197.47±10.15  | -130.87±8.05   | -92.93±6.35    | -64.69±4.96    | -41.06±3.80   | -20.14±2.84   | -1.08±1.98   | 15.31±1.91 | 30.48±2.57 | 46.24±3.67 | 63.64±5.04  |
|                       | Ma1 $\alpha$ +Ma1 $\beta$ | -526.67±58.45* | -285.59±24.10* | -182.37±12.74* | -125.27±8.76*  | -79.63±4.38*   | -55.98±1.96*  | -29.07±2.67*  | -8.66±2.85*  | 9.99±2.32  | 26.74±2.07 | 43.81±2.23 | 64.84±2.79  |
|                       | <i>P</i> vaule            | 0.006          | 0.003          | 0.003          | 0.008          | 0.039          | 0.008         | 0.036         | 0.041        | 0.093      | 0.282      | 0.590      | 0.843       |
| 25 ng Ma1 $\alpha$    | Ma1 $\alpha$              | -333.37±34.87  | -188.46±16.19  | -122.49±9.59   | -85.39±6.31    | -59.46±4.53    | -38.87±3.36   | -21.14±2.57   | -4.60±1.92   | 9.73±1.52  | 24.63±2.17 | 40.73±5.31 | 45.69±4.01  |
|                       | Ma1 $\alpha$ +Ma1 $\beta$ | -568.68±69.48* | -311.58±36.61* | -206.52±37.36* | -153.95±21.45* | -117.68±12.38* | -85.20±12.12* | -52.51±12.60* | -22.42±7.96* | 8.88±4.41  | 30.61±2.01 | 55.37±5.31 | 65.32±7.46* |
|                       | <i>P</i> vaule            | 0.008          | 0.007          | 0.045          | 0.007          | <0.001         | 0.002         | 0.027         | 0.045        | 0.858      | 0.061      | 0.069      | 0.034       |

Note: Student *t*-test was used to detect the difference between Ma1 $\alpha$  alone and co-expression of Ma1 $\alpha$  and Ma1 $\beta$  at each level of Ma1 $\alpha$ . An asterisk indicates a significant difference at  $P < 0.05$ .

**Supplemental Table 3. List of primers used in this paper.**

| <b>Name</b>                         | <b>Sequence (5'-3')</b>                                |
|-------------------------------------|--------------------------------------------------------|
| <b>Gateway primers</b>              |                                                        |
| Ma1-GW-F                            | GGGGACAAGTTTGTACAAAAAGCAGGCTTCATGGCGGCCAAAATCGG        |
| Ma1-GW-R                            | GGGGACCACTTTGTACAAGAAAGCTGGGTCTTAGTTCTTCAACCGCA        |
| Ma1-GW-R-W/O                        | GGGGACCACTTTGTACAAGAAAGCTGGGTCTTCTTCAACCGCAAAC         |
| MYB73-GW-F                          | GGGGACAAGTTTGTACAAAAAGCAGGCTTCATGGAAGCGATGAATATGTGC    |
| MYB73-GW-R                          | GGGGACCACTTTGTACAAGAAAGCTGGGTCTTAATTTAATCTATGAAGCTCCG  |
| MYB73-GW-R-W/O                      | GGGGACCACTTTGTACAAGAAAGCTGGGTCAATTTAATCTATGAAGCTCCGAAG |
| AtALS3-GW-F                         | GGGGACAAGTTTGTACAAAAAGCAGGCTTCATGGATCTGAAATGGGATGAT    |
| AtALS3-GW-R                         | GGGGACCACTTTGTACAAGAAAGCTGGGTCTCAATCTGAGGAGAAGACATG    |
| <b>Alternative splicing primers</b> |                                                        |
| AS-F                                | ATGGCGGCCAAAATCGG                                      |
| AS-R                                | TTAGTTCTTCAACCGCA                                      |
| AS-F1                               | ATGGGGTTGACGTTGGCGCTC                                  |
| AS-R1                               | CCTGTCTCTTTTCGGCTGGTG                                  |
| AS-F2                               | TACGGATTTCCGGTATTCTTGTTGA                              |
| <b>RT-qPCR</b>                      |                                                        |
| qMa1-UTR-F                          | TTCAAATCCTTCTTCTCCGACG                                 |
| qMa1-UTR-R                          | CTGTTGAAGCCCAAGTCGGAG                                  |
| qMYB73-F                            | CCAACAAGCCCGAACGAA                                     |
| qMYB73-R                            | ACCACCTGAGCCTGCACGAC                                   |
| qMa1 $\beta$ -F                     | GTGTGTTTATAGCAGGGGAAGATC                               |
| qMa1 $\beta$ -R                     | CAACGGGTCATCAGAAGCTTGG                                 |
| qMa1 $\alpha$ -F                    | CAGGATTTTGTGCTAGTTACGCC                                |
| qMa1 $\alpha$ -R                    | CAGCAATAAGCAGCAATCGATA                                 |

|                        |                                  |
|------------------------|----------------------------------|
| qMa1-F                 | GCGGCTGCTTCCGAAGAATCTC           |
| qMa1-R                 | TATTAGCAGCGACACGAGCGCC           |
| qRT-MdMYB21-F          | CCTTCCGTGCCACTCTCAAC             |
| qRT-MdMYB21-R          | TAAGCTGCTGTAGCCAAGTCG            |
| qRT-MdMYB44-F          | ATCGCTCAGCCTTCCCTTC              |
| qRT-MdMYB44-R          | TCTCGCTGTTCTGGTTGCTC             |
| qRT-MdMYB123-F         | AGGAAACAAATGCAGGGGGA             |
| qRT-MdMYB123-R         | AGTCGTCGTGGTTAATCTCCG            |
| qRT-MdWRKY31-F         | ACCAACAACACTACAGTGCCTGC          |
| qRT-MdWRKY31-R         | CAATCCTTGCTTCTTTTCTTGATC         |
| qRT-MdERF72-F          | AGAGGGCTCTTTTTTCTC               |
| qRT-MdERF72-R          | ACCTTGTGATTCTCCGG                |
| qActin-F               | TGACCGAATGAGCAAGGAAATTACT        |
| qActin-R               | TACTCAGCTTTGGCAATCCACATC         |
| <b>User primers</b>    |                                  |
| Ma1-USER-F             | GGCTTAAUATGGCGGCCAAAATCGG        |
| Ma1-USER-R             | GGTTTAAUCCTTAGTTCTTCAACCGCAAAC   |
| Ma1-USER-R-W/O         | GGTTTAAUCCGTTCTTCAACCGCAAACCTCC  |
| <b>IL60 expression</b> |                                  |
| Ma1-IL60-F             | CCGTCGACATGGCGGCCAAAATCGG        |
| Ma1-IL60-R             | GCTCTAGATTAGTTCTTCAACCGCAAACCTCC |
| MYB73-IL60-F           | CCGTCGACATGGAAGCGATGAATATGTGC    |
| MYB73-IL60-R           | GCTCTAGATTAATTTAATCTATGAAGCTCCG  |
| <b>TRV2 expression</b> |                                  |
| Ma1-TRV2-F             | GCTCTAGAATGGCGGCCAAAATCGG        |
| Ma1-TRV2-R             | GGGGTACCAACTTGATGAAAGTGCCCTGG    |
| MYB73-TRV2-F           | GCTCTAGAATGGAAGCGATGAATATGTGC    |
| MYB73-TRV2-R           | GGGGTACCCGACCTTTTATGTACCGGC      |



|                       |                                         |
|-----------------------|-----------------------------------------|
| <b>Y1H assay</b>      |                                         |
| pGADT7-MdMYB73-F      | TGGAATTCATGGAAGCGATGAATATGTGC           |
| pGADT7-MdMYB73-R      | TAGGATCCTTAATTTAATCTATGAAGCTCCG         |
| pHis2-Ma1-Pro-F       | TAGAATTCGTATAAATCATGTAAGCCAGGTG         |
| pHis2-Ma1-Pro-R       | TTGAGCTCTTCGTCGGAGAAGAAGGATTTG          |
| <b>ChIP-PCR</b>       |                                         |
| Ma1-ChIP-F            | CCAAAATAGTATAACCACATGTCTCC              |
| Ma1-ChIP-R            | GAGGGAAAGTGGAAAGCAGAG                   |
| <b>Dual LUC assay</b> |                                         |
| MYB73-SK-F            | GAATTCTGGAAGCGATGAATATGTG               |
| MYB73-SK-R            | GTCGAGATTTAATCTATGAAGCTCCG              |
| Ma1-Pro-LUC-F         | GTCGACAGAGAGAGTTATAAGCTTAG              |
| Ma1-Pro-LUC-R         | GGATCCTTGTTGGAAGAGGGAAAGTG              |
| <b>LCI assay</b>      |                                         |
| Ma1-JW771-F           | ACGGGGGACGAGCTCGGTACCATGGCGGCCAAAATCGG  |
| Ma1-JW771-R           | CGCGTACGAGATCTGGTCGACGTTCTTCAACCGCAAAC  |
| Ma1-JW772-F           | TACGCGTCCCAGGGCGGTACCATGGCGGCCAAAATCGG  |
| Ma1-JW772-R           | ACGAAAGCTCTGCAGGTCGACTTAGTTCTTCAACCGCAA |
